# Supplementary material for: The potential of a targeted unilateral compound training program to reduce lower limb strength asymmetry and increase performance: a proof-of-concept in basketball
Source: Front Physiol. 2024 Jun 26;15:1361719. doi: 10.3389/fphys.2024.1361719 (PMC11234801; doi:10.3389/fphys.2024.1361719)
Supplement: Supplementary file 2 [file Table1.xlsx]

## Sheet: Pre—CMJ—asymmetry
CMJ
height			Power			impulse					height			Power			impulse
left leg	right leg	both legs	left leg	right leg	both legs	left leg	right leg	both legs	A-B	A+B	asymmetry%	A-B	A+B	asymmetry%	A-B	A+B	asymmetry%	group
24.721	16.158	50.699	2208.86	1689.09	4737.03	134.343	108.611	258.621	8.563	40.879	41.8944	519.774	3897.96	26.6691	25.732	242.954	21.1826	1
21.204	24.832	48.824	2297.98	2696.8	4215.52	138.689	143.471	225.939	3.628	46.036	15.7616	398.819	4994.78	15.9694	4.782	282.16	3.38957	1
23.204	27.319	47.289	2615.08	2864.86	4394.14	153.625	166.692	240.634	4.115	50.523	16.2896	249.78	5479.95	9.11615	13.067	320.317	8.15879	1
20.017	22.463	51.015	1984.03	2171.8	4303.21	123.871	128.06	227.788	2.446	42.48	11.516	187.772	4155.84	9.03655	4.189	251.931	3.32551	1
27.667	22.401	42.976	2668.89	2292.04	4132.34	151.442	147.935	229.397	5.266	50.068	21.0354	376.846	4960.93	15.1926	3.507	299.377	2.34287	1
25.386	24.611	48.054	2621.03	2473.99	4485.88	149.529	147.228	245.642	0.775	49.997	3.10019	147.042	5095.02	5.77199	2.301	296.757	1.55076	1
22.835	27.088	48.515	2121.78	2497.84	4287.36	139.586	142.932	231.393	4.253	49.923	17.0382	376.057	4619.63	16.2808	3.346	282.518	2.3687	1
25.61	26.515	50.384	2787.63	3042.56	4536.71	172.602	175.624	245.24	0.905	52.125	3.47242	254.934	5830.19	8.74531	3.022	348.226	1.73565	1
30.902	24.721	41.822	3082.35	2507.16	3563.99	177.286	158.569	194.787	6.181	55.623	22.2246	575.186	5589.52	20.5809	18.717	335.855	11.1459	1
25.61	20.942	52.77	3006.43	2565.88	4545.64	163.636	161.487	241.326	4.668	46.552	20.055	440.548	5572.31	15.8121	2.149	325.123	1.32196	1
22.848	24.991	56.869	2790.07	2938.05	4658.55	159.233	162.29	240.502	2.143	47.839	8.95922	147.98	5728.13	5.16678	3.057	321.523	1.90157	1
25.275	22.673	56.535	3148.49	2990.55	4457.07	180.376	170.841	226.474	2.602	47.948	10.8534	157.942	6139.04	5.14549	9.535	351.217	5.42969	1
18.045	22.221	46.531	2325.93	2775.91	4076.33	155.059	158.076	220.568	4.176	40.266	20.7421	449.983	5101.85	17.64	3.017	313.135	1.92696	1
22.832	27.551	57.539	2523.3	2888.35	4699.22	154.508	162.748	241.915	4.719	50.383	18.7325	365.044	5411.65	13.491	8.24	317.256	5.19454	1
25.947	24.386	48.67	2337.98	2203.93	3662.57	135.378	134.907	188.499	1.561	50.333	6.20269	134.053	4541.91	5.90293	0.471	270.285	0.348521	1
18.119	23.253	52.288	2541.52	3110.36	3882.18	166.917	171.341	195.381	5.134	41.372	24.8187	568.834	5651.88	20.129	4.424	338.258	2.61575	2
23.358	18.632	52.449	2909.03	2486.36	4073.15	157.894	152.191	208.512	4.726	41.99	22.5101	422.669	5395.39	15.6678	5.703	310.085	3.67835	2
23.74	25.565	52.931	2764.72	2994.45	4419.51	170.498	181.66	232.026	1.825	49.305	7.4029	229.728	5759.16	7.97782	11.162	352.158	6.3392	2
19.413	23.149	40.402	2345.67	2651.04	3160.7	144.089	150.093	171.744	3.736	42.562	17.5556	305.375	4996.71	12.223	6.004	294.182	4.08183	2
20.513	23.873	57.875	2568.84	3034.26	4402.51	158.485	167.267	219.033	3.36	44.386	15.1399	465.418	5603.1	16.6129	8.782	325.752	5.39183	2
21.528	23.734	60.602	2775.75	2988.25	4658.64	164.416	175.2	231.03	2.206	45.262	9.74769	212.504	5764	7.37349	10.784	339.616	6.3507	2
21.621	19.62	50.227	2730.61	2533.43	3802.38	153.036	147.15	194.63	2.001	41.241	9.70394	197.181	5264.05	7.49161	5.886	300.186	3.92157	2
25.275	28.947	57.203	3012.59	3253.38	4905.32	173.696	179.991	257.959	3.672	54.222	13.5443	240.79	6265.98	7.68563	6.295	353.687	3.55964	2
21.117	19.23	61.121	2608.29	2092.66	4916.65	134.083	132.082	249.331	1.887	40.347	9.35386	515.631	4700.95	21.9373	2.001	266.165	1.50358	2
22.502	26.835	56.535	2829.77	3110.68	4683.57	164.44	168.855	243.126	4.333	49.337	17.5649	280.914	5940.46	9.45766	4.415	333.295	2.6493	2
22.045	20.213	47.289	2544.73	2433.53	4212.94	149.74	143.383	228.45	1.832	42.258	8.67055	111.203	4978.26	4.46754	6.357	293.123	4.33743	2
29.804	25.088	51.332	2834.5	2669.64	4730.15	164.435	156.764	257.056	4.716	54.892	17.1828	164.861	5504.15	5.99043	7.671	321.199	4.77648	2
23.149	18.413	54.065	2696.34	2490.97	4669.55	152.178	146.091	247.526	4.736	41.562	22.79	205.375	5187.31	7.91836	6.087	298.269	4.08155	2
28.018	24.721	53.092	2907.29	2707.16	4338.68	168.81	158.569	225.924	3.297	52.739	12.5031	200.128	5614.46	7.12902	10.241	327.379	6.25636	2
20.358	24.957	54.065	2065.43	2562.49	3944.75	127.761	132.249	195.415	4.599	45.315	20.2979	497.059	4627.92	21.4809	4.488	260.01	3.45217	2

## Sheet: Post—CMJ—asymmetry
CMJ
height			Power			impulse					height			Power			impulse
left leg	right leg	both legs	left leg	right leg	both legs	left leg	right leg	both legs	A-B	A+B	asymmetry%	A-B	A+B	asymmetry%	A-B	A+B	asymmetry%	group
26.083	20.244	56.203	2473.64	1755.01	4071.12	145.713	122.202	272.296	5.839	46.327	25.2078	718.627	4228.65	33.9885	23.511	267.915	17.5511	1
23.611	26.784	48.054	2383.39	2675.99	4168.78	142.834	148.761	224.149	3.173	50.395	12.5925	292.601	5059.38	11.5667	5.927	291.595	4.06523	1
24.502	28.135	52.128	2693.87	2914.39	4687.87	157.863	169.164	252.647	3.633	52.637	13.804	220.524	5608.27	7.86425	11.301	327.027	6.91136	1
21.991	24.311	50.227	2103.85	2323.28	4255.38	129.556	134.453	226.022	2.32	46.302	10.0212	219.424	4427.13	9.91269	4.897	264.009	3.70972	1
33.413	28.534	42.253	3017.67	2742.91	4088.46	166.427	159.094	227.46	4.879	61.947	15.7522	274.755	5760.58	9.53914	7.333	325.521	4.50539	1
28.957	26.835	49.757	2534.29	2348.28	4589.25	150.257	147.843	249.959	2.122	55.792	7.60683	186.005	4882.57	7.61914	2.414	298.1	1.61959	1
23.283	29.629	44.884	2227.58	2569.98	4066.96	135.329	141.715	222.564	6.346	52.912	23.987	342.402	4797.56	14.274	6.386	277.044	4.6101	1
25.61	27.858	56.535	2987.63	3263.38	4910.07	172.602	176.757	259.779	2.248	53.468	8.40877	275.754	6251.01	8.82271	4.155	349.359	2.37864	1
33.973	29.721	45.479	2943.86	2607.16	3785.97	165.632	146.569	203.126	4.252	63.694	13.3513	336.696	5551.03	12.1309	19.063	312.201	12.212	1
26.463	23.855	47.289	2915.4	2541.02	4212.94	155.252	153.684	228.45	2.608	50.318	10.3661	374.384	5456.42	13.7227	1.568	308.936	1.0151	1
24.629	27.319	59.915	2958.88	3200.76	4843.44	171.43	173.637	246.859	2.69	51.948	10.3565	241.883	6159.64	7.8538	2.207	345.067	1.27917	1
26.973	23.947	58.382	3351.56	3089.28	4569.19	261.824	232.76	230.143	3.026	50.92	11.8853	262.278	6440.84	8.14421	29.064	494.584	11.7529	1
21.718	25.817	43.998	2584.68	2890.69	4149.08	149.485	151.858	229.171	4.099	47.535	17.2462	306.009	5475.38	11.1776	2.373	301.343	1.57495	1
25.203	29.396	57.775	2767.22	3021.74	4895.64	161.718	173.735	248.625	4.193	54.599	15.3593	254.515	5788.96	8.79312	12.017	335.453	7.16464	1
27.083	28.844	49.747	2428.34	2613.83	3606.54	143.324	142.736	186.704	1.761	55.927	6.29749	185.493	5042.17	7.35767	0.588	286.06	0.411103	1
25.611	27.202	59.402	3403.49	3632.16	4314	193.19	196.278	208.247	1.591	52.813	6.02503	228.673	7035.65	6.50041	3.088	389.468	1.58575	2
24.525	21.734	56.037	2779.87	2621.15	4290.95	156.832	154.745	215.526	2.791	46.259	12.0668	158.714	5401.02	5.87718	2.087	311.577	1.33964	2
25.335	26.456	50.384	3291.89	3384.52	4264.91	186.86	196.748	226.376	1.121	51.791	4.32894	92.634	6676.4	2.77497	9.888	383.608	5.15526	2
23.418	25.386	44.588	2728.07	2847.53	3414.79	154.331	160.688	180.421	1.968	48.804	8.06491	119.457	5575.6	4.28499	6.357	315.019	4.03595	2
23.747	25.613	60.775	2781.64	2874.91	4578.54	159.311	152.873	224.453	1.866	49.36	7.56078	93.266	5656.55	3.29763	6.438	312.184	4.12449	2
22.358	24.014	60.775	2806.13	2983.85	4669.14	167.555	162.53	231.359	1.656	46.372	7.14224	177.719	5789.98	6.13885	5.025	330.085	3.04467	2
22.718	21.313	50.857	2739.38	2595.5	3840.62	153.518	147.725	195.847	1.405	44.031	6.38187	143.884	5334.88	5.39408	5.793	301.243	3.84606	2
27.253	29.804	56.869	3093.36	3287.5	4885.05	183.643	188.617	257.203	2.551	57.057	8.94194	194.146	6380.86	6.08526	4.974	372.26	2.67233	2
24.945	23.418	58.044	2363.53	2446.87	4729.87	145.421	146.757	242.974	1.527	48.363	6.31474	83.341	4810.41	3.46503	1.336	292.178	0.914511	2
24.611	26.287	57.371	2836.39	2938.12	4734.32	166.808	170.326	244.916	1.676	50.898	6.58572	101.733	5774.51	3.52352	3.518	337.134	2.087	2
24.313	23.568	49.134	2539.6	2376.48	4324.93	147.736	151.506	232.865	0.745	47.881	3.11188	163.121	4916.08	6.63623	3.77	299.242	2.5197	2
32.776	29.964	53.254	3014.9	2883.51	4846.82	173.44	166.1	186.336	2.812	62.74	8.96398	131.388	5898.42	4.45503	7.34	339.54	4.3235	2
24.045	21.413	53.577	2816.53	2617.47	4639.92	162.218	156.097	246.408	2.632	45.458	11.5799	199.063	5434	7.32657	6.121	318.315	3.84588	2
29.632	26.885	51.65	2641.06	2495.72	4251.15	155.037	150.565	222.834	2.747	56.517	9.72097	145.342	5136.78	5.65887	4.472	305.602	2.92668	2
25.021	27.973	56.203	2496.41	2645.56	4074.52	142.469	146.327	199.241	2.952	52.994	11.1409	149.146	5141.98	5.80112	3.858	288.796	2.67178	2

## Sheet: Explosive power
前测									post									change
立定跳远	CMJ高度	CMJ功率	CMJ冲量	10M	20M				standing long jump	CMJ（high）	CMJ（Power）	CMJ（Impulse）	10M	20M				standing long jump	CMJ（high）	CMJ（Power）	CMJ（Impulse）	10M	20M
280	50.699	4737.03	195.381	1.76	3.23			1	284	55.203	4071.12	208.247	1.76	3.2				0.0142857	0.088838	-0.140575	0.0658508	0	-0.00928793
271	48.824	4215.52	208.512	1.87	2.95			1	265	47.054	4168.78	215.526	1.74	2.94				-0.0221402	-0.0362527	-0.0110874	0.0336384	-0.0695187	-0.00338983
290	47.289	4394.14	232.026	1.88	2.9			1	292	51.128	4687.87	226.376	1.71	2.9				0.00689655	0.0811817	0.0668454	-0.0243507	-0.0904255	0
276	51.015	4303.21	171.744	1.74	2.96			1	275	49.227	4255.38	180.421	1.71	2.88				-0.00362319	-0.0350485	-0.0111154	0.0505229	-0.0172414	-0.027027
260	42.976	4132.34	219.033	1.78	2.99			1	260	41.253	4088.46	224.453	1.78	3.04				0	-0.0400921	-0.0106201	0.0247451	0	0.0167224
243	48.054	4485.88	231.03	1.82	2.98			1	256	48.757	4589.25	231.359	1.72	3				0.0534979	0.0146294	0.0230439	0.00142406	-0.0549451	0.00671141
279	48.515	4287.36	194.63	1.95	3.21			1	281	43.884	4066.96	195.847	1.83	2.96				0.00716846	-0.095455	-0.0514074	0.00625289	-0.0615385	-0.0778816
275	50.384	4536.71	257.959	1.84	3.09			1	276	55.535	4910.07	257.203	1.77	2.76				0.00363636	0.102235	0.0822989	-0.0029307	-0.0380435	-0.106796
280	41.822	3563.99	249.331	1.78	3			1	272	44.479	3785.97	242.974	1.74	2.92				-0.0285714	0.0635312	0.062284	-0.0254962	-0.0224719	-0.0266667
263	52.77	4545.64	243.126	1.85	3			1	256	46.289	4212.94	244.916	1.77	3.01				-0.026616	-0.122816	-0.0731904	0.00736244	-0.0432432	0.00333333
286	56.869	4658.55	228.45	1.84	3.07			1	285	58.915	4843.44	232.865	1.82	3.01				-0.0034965	0.0359774	0.039689	0.0193259	-0.0108696	-0.019544
283	56.535	4457.07	257.056	1.73	2.87			1	283	57.382	4569.19	186.336	1.79	2.98				0	0.0149819	0.0251537	-0.275115	0.0346821	0.0383275
273	46.531	4076.33	247.526	1.83	3.04			1	269	42.998	4149.08	246.408	1.6	3.08				-0.014652	-0.0759279	0.0178462	-0.0045167	-0.125683	0.0131579
277	57.539	4699.22	225.924	1.74	2.98			1	276	56.775	4895.64	222.834	1.74	2.94				-0.00361011	-0.013278	0.0417997	-0.0136772	0	-0.0134228
272	48.67	3662.57	195.415	1.73	2.97			1	266	48.747	3606.54	199.241	1.62	2.98				-0.0220588	0.00158208	-0.0152969	0.0195788	-0.0635838	0.003367
288	52.288	3882.18	258.621	1.97	3.08			2	291	61.202	4314	272.296	1.67	3.01				0.0104167	0.170479	0.111231	0.0528766	-0.152284	-0.0227273
270	52.449	4073.15	225.939	1.73	3.06			2	273	57.837	4290.95	224.149	1.71	3.01				0.0111111	0.102728	0.0534701	-0.00792249	-0.0115607	-0.0163399
278	52.931	4419.51	240.634	1.85	3.17			2	282	52.184	4264.91	252.647	1.83	3.12				0.0143885	-0.0141127	-0.0349819	0.0499223	-0.0108108	-0.0157729
263	40.402	3160.7	227.788	1.81	2.96			2	266	46.388	3414.79	226.022	1.73	2.92				0.0114068	0.148161	0.0803907	-0.00775282	-0.0441989	-0.0135135
301	57.875	4402.51	229.397	1.81	2.78			2	299	62.575	4578.54	227.46	1.63	2.74				-0.00664452	0.0812095	0.039984	-0.00844388	-0.0994475	-0.0143885
291	60.602	4658.64	245.642	1.84	2.83			2	295	62.575	4669.14	249.959	1.7	2.8				0.0137457	0.0325567	0.00225431	0.0175744	-0.076087	-0.0106007
270	50.227	3802.38	231.393	1.8	2.96			2	277	52.657	3840.62	222.564	1.78	2.89				0.0259259	0.0483804	0.0100571	-0.0381559	-0.0111111	-0.0236486
286	57.203	4905.32	245.24	1.65	2.86			2	291	58.669	4885.05	259.779	1.61	2.79				0.0174825	0.025628	-0.00413306	0.0592848	-0.0242424	-0.0244755
293	61.121	4916.65	194.787	1.97	2.95			2	291	59.844	4729.87	203.126	1.79	2.93				-0.00682594	-0.020893	-0.0379881	0.0428109	-0.0913706	-0.00677966
275	56.535	4683.57	241.326	1.7	2.41			2	289	59.171	4734.32	228.45	1.65	2.36				0.0509091	0.046626	0.0108347	-0.0533552	-0.0294118	-0.0207469
300	47.289	4212.94	240.502	1.84	2.9			2	299	50.934	4324.93	246.859	1.57	2.78				-0.00333333	0.0770792	0.0265828	0.0264322	-0.146739	-0.0413793
275	51.332	4730.15	226.474	1.73	2.76			2	283	55.054	4846.82	230.143	1.69	2.71				0.0290909	0.0725084	0.0246643	0.0162005	-0.0231214	-0.0181159
260	54.065	4669.55	220.568	1.89	3.12			2	263	55.377	4639.92	229.171	1.68	3.03				0.0115385	0.0242671	-0.00634366	0.0390038	-0.111111	-0.0288462
272	53.092	4338.68	241.915	1.8	3.05			2	276	53.45	4251.15	248.625	1.73	3.14				0.0147059	0.00674301	-0.0201741	0.027737	-0.0388889	0.0295082
264	54.065	3944.75	188.499	1.72	3.03			2	271	58.003	4074.52	186.704	1.67	2.8				0.0265152	0.0728383	0.0328984	-0.0095226	-0.0290698	-0.0759076

## Sheet: 1RM
pre		post		rate of change
1RM		1RM		1RM
bench press（KG）	Back Squat（KG）	bench press（KG）	Back Squat（KG）	bench press（KG）	Back Squat（KG）
70	100	70	105	0	0.05	1
70	127.5	70	135	0	0.0588235	1
65	100	68	105	0.0461538	0.05	1
65	115	70	115	0.0769231	0	1
55	95	57.5	100	0.0454545	0.0526316	1
75	125	75	125	0	0	1
55	120	60	120	0.0909091	0	1
75	132.5	75	140	0	0.0566038	1
75	142.5	75	145	0	0.0175439	1
60	115	68	115	0.133333	0	1
65	110	70	120	0.0769231	0.0909091	1
75	120	75	125	0	0.0416667	1
65	100	65	110	0	0.1	1
65	105	67.5	112	0.0384615	0.0666667	1
60	100	60	105	0	0.05	1
70	125	70	130	0	0.04	2
70	115	75	120	0.0714286	0.0434783	2
70	115	75	115	0.0714286	0	2
65	95	65	100	0	0.0526316	2
70	100	70	105	0	0.05	2
75	125	78	125	0.04	0	2
60	132.5	60	140	0	0.0566038	2
60	110	65	115	0.0833333	0.0454545	2
70	100	75	110	0.0714286	0.1	2
75	145	75	150	0	0.0344828	2
60	110	60	115	0	0.0454545	2
65	95	65	100	0	0.0526316	2
65	110	65	115	0	0.0454545	2
50	110	60	115	0.2	0.0454545	2
50	85	52.5	90	0.05	0.0588235	2

## Sheet: IMTP
pre		post
IMTP		IMTP		pre-asymmetry%			post-asymmetry%
left leg	right leg	left leg	right leg	A-B	A+B	IMTP	A-B	A+B	IMTP
56	44	51	49	12	100	24	2	100	4	1
50	50	51	49	0	100	0	2	100	4	1
49	51	50	50	2	100	4	0	100	0	1
53	47	51	49	6	100	12	2	100	4	1
54	46	51	49	8	100	16	2	100	4	1
54	46	49	51	8	100	16	2	100	4	1
53	47	52	48	6	100	12	4	100	8	1
51	49	50	50	2	100	4	0	100	0	1
53	47	52	48	6	100	12	4	100	8	1
51	48	51	49	3	99	6.06061	2	100	4	1
50	50	49	51	0	100	0	2	100	4	1
51	49	49	51	2	100	4	2	100	4	1
55	45	53	47	10	100	20	6	100	12	1
47	53	49	51	6	100	12	2	100	4	1
52	48	51	49	4	100	8	2	100	4	1
48	52	49	51	4	100	8	2	100	4	2
53	47	51	49	6	100	12	2	100	4	2
55	45	52	52	10	100	20	0	104	0	2
49	51	51	49	2	100	4	2	100	4	2
52	48	51	49	4	100	8	2	100	4	2
51	49	50	50	2	100	4	0	100	0	2
49	51	50	50	2	100	4	0	100	0	2
52	48	51	49	4	100	8	2	100	4	2
53	47	49	51	6	100	12	2	100	4	2
54	46	52	51	8	100	16	1	103	1.94175	2
52	48	51	49	4	100	8	2	100	4	2
51	49	49	51	2	100	4	2	100	4	2
54	46	51	49	8	100	16	2	100	4	2
52	48	48	49	4	100	8	1	97	2.06186	2
51	49	50	50	2	100	4	0	100	0	2
